# Supplementary material for: Zeolite-templated nanoporous carbon for high-performance supercapacitors
Source: Royal Society of Chemistry journal article supplement (doi:10.1039/c8ta00850g), 2018-01-01
Supplement: c8ta00850g1.pdf [file c8ta00850g1.pdf]

## Supporting information

### Zeolite-templated nanoporous carbon for high-performance supercapacitors

Hao Lu,<sup>a</sup> Kyoungsoo Kim,<sup>b</sup> Yonghyun Kwon,<sup>b,c</sup> Xiaoming Sun,<sup>a</sup> Ryong Ryoo<sup>\*a,b,c</sup> and X. S. Zhao<sup>\*a</sup>

<sup>a</sup>School of Chemical Engineering, The University of Queensland, St Lucia, Brisbane, QLD 4072, Australia. E-mail: [george.zhao@uq.edu.au](mailto:george.zhao@uq.edu.au) (X. S. Zhao)

<sup>b</sup>Center for Nanomaterials and Chemical Reactions, Institute for Basic Science (IBS), Daejeon 34141, Republic of Korea.

<sup>c</sup>Department of Chemistry, KAIST, Daejeon 34141, Republic of Korea. E-mail: [rryoo@kaist.ac.kr](mailto:rryoo@kaist.ac.kr) (R. Ryoo)

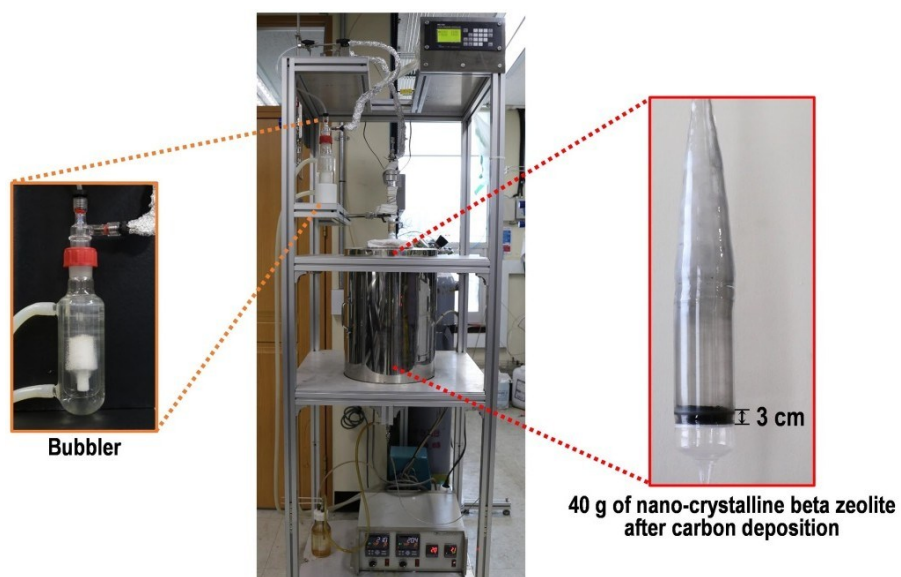

Fig.S1. Photograph of the carbon deposition rig for carbon synthesis in a large-scale.  $N_2$ /ethylene mixture was bubbled through water before reaching a zeolite bed (left inset). A 3 cm-thick bed of zeolite filled in the plug-flow reactor equipped with a fritted disk was used in the synthesis (right inset).

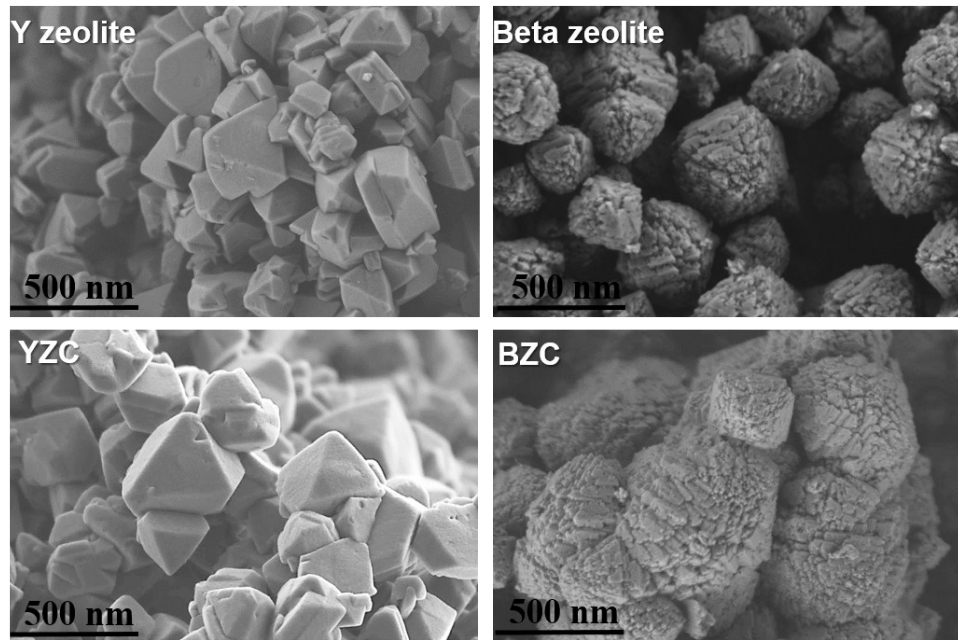

Fig. S2. SEM images of YZC and BZC, and their separate template.

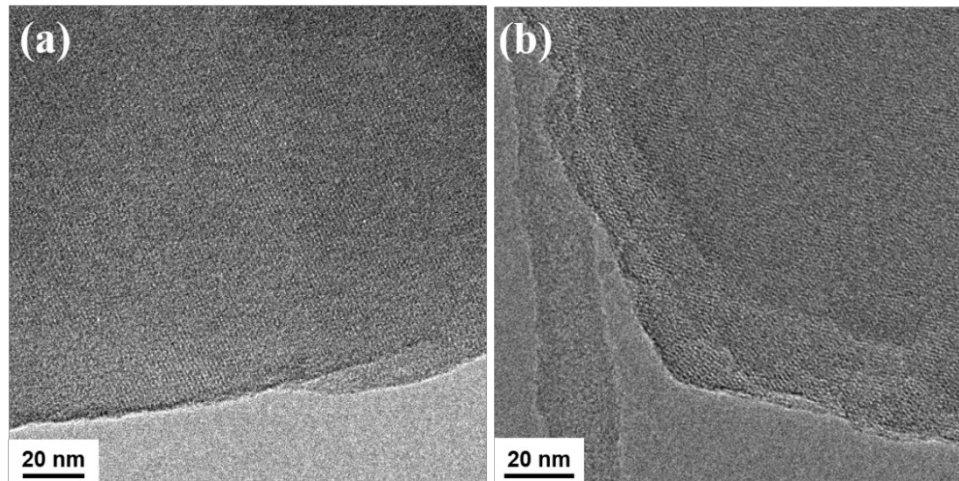

Fig. S3. TEM images of YZC and BZC.

Fig. 2a schematically shows the carbon deposition process using calcium-containing zeolites as templates. Firstly, the ion exchange for  $\text{Na}^+$  containing template with  $\text{Ca}^{2+}$  was conducted. Then the Ca-containing template was heated at  $600\text{ }^\circ\text{C}$  for 1 h under ethylene flow, followed by heat treatment at  $850\text{ }^\circ\text{C}$  for 2 h under  $\text{N}_2$  atmosphere. The  $\text{Ca}^{2+}$  can promote the ethylene carbonization, which lowers the carbonization temperature, thus preventing the non-selective carbon deposition at the external surfaces.<sup>1, 2</sup> Finally, the sample was washed with HF/HCl solution, which washes away the zeolite template and simultaneously

adds certain content of oxygen-containing surface functional groups, contributing to pseudocapacitance. The SEM images (Fig. 2b-c, Fig. S2) show that the carbon products were all good replica of their separate template. The TEM images in Fig. 2d and Fig. S3 show ordered porous structure of the carbons. Especially the TEM image in Fig. 2d and the HRTEM image in Fig. 2e show ordered mesoporous/microporous structure of NBZC, revealing the selective deposition of carbon inside the template, which was further confirmed by the XRD results in Fig. S4.<sup>1, 3, 4</sup>

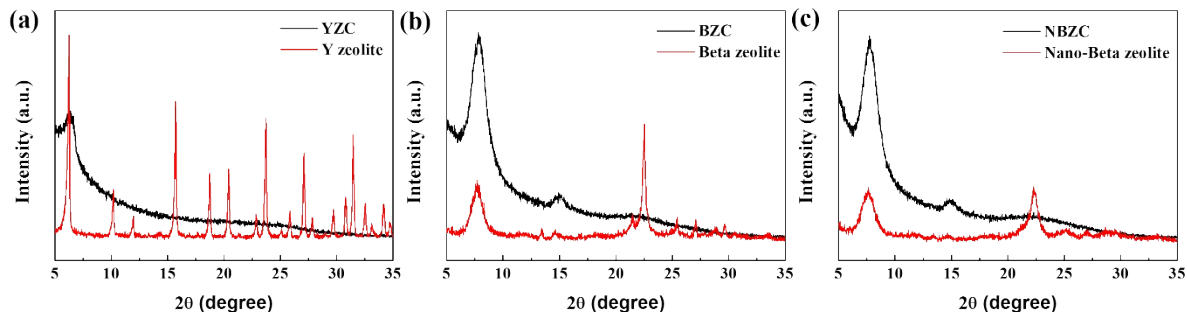

Fig. S4. XRD patterns of YZC, BZC, and NBZC and their separate template. The carbons show a well-resolved peak at  $2\theta \approx 7^\circ$ , which corresponds to the (100) or (101) diffraction of the templates, indicating the ordered micropores in the carbons.<sup>1, 3, 4</sup>

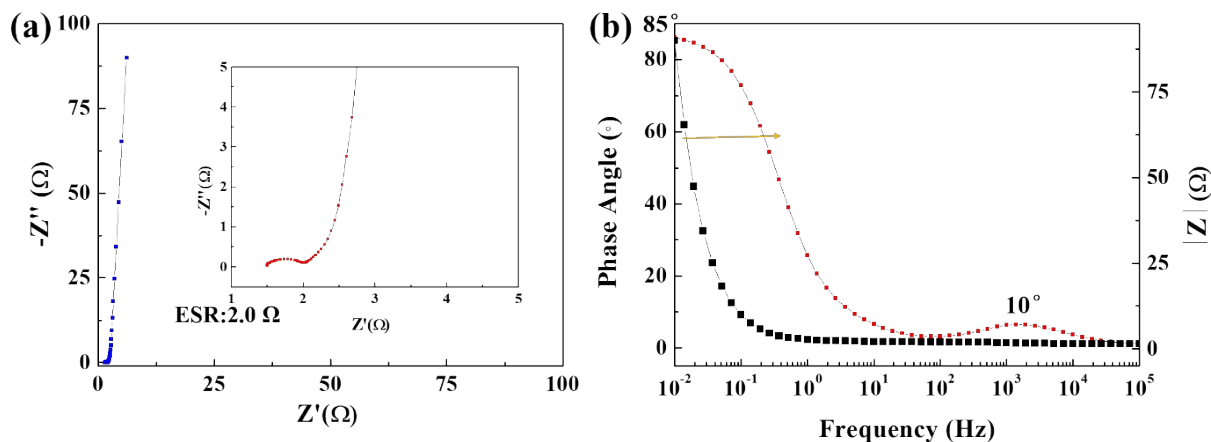

Fig. S5. (a) Nyquist plot, (b) Bode plots of NBZC in a three-electrode system with 1 M  $\text{H}_2\text{SO}_4$  as aqueous electrolyte.

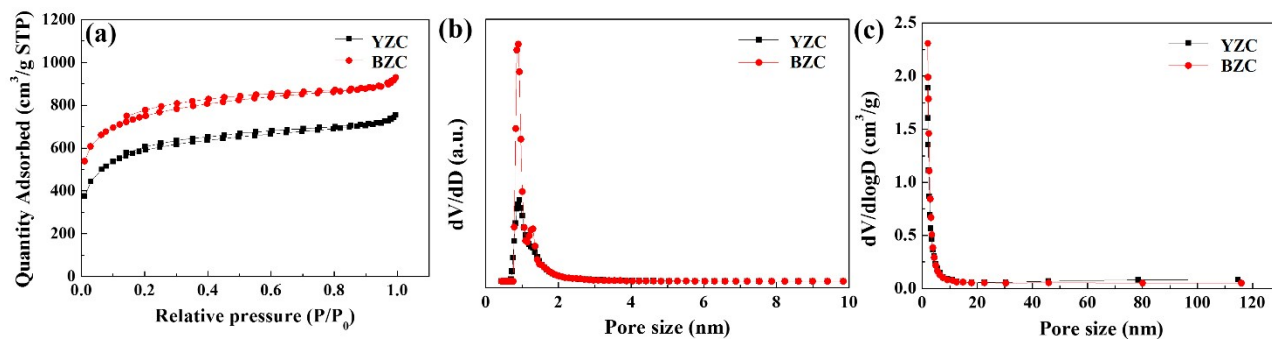

Fig. S6. N<sub>2</sub> adsorption/desorption isotherms (a) and pore size distributions calculated using the DFT model (b) and BJH model (c) of YZC and BZC.

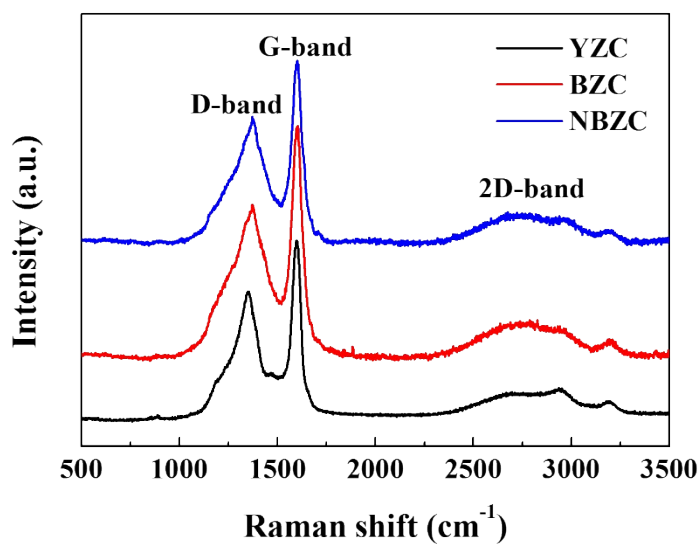

Fig. S7. Raman spectra of YZC, BZC, and NBZC.

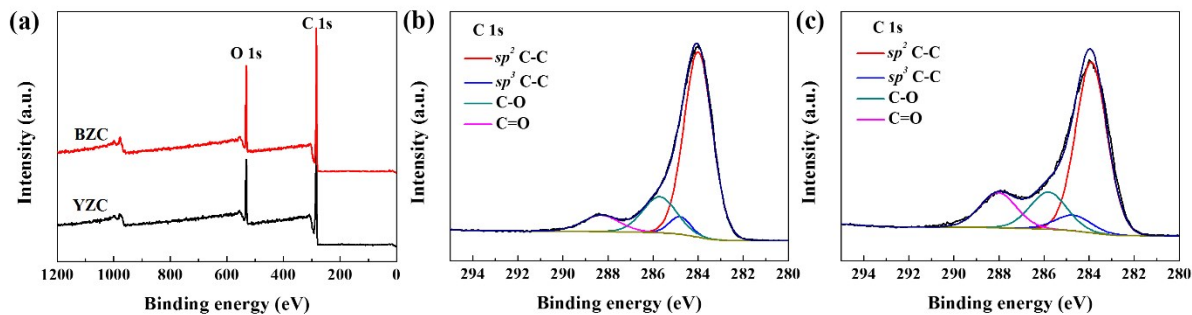

Fig. S8. XPS survey spectra of YZC and BZC (a), C 1s envelope of YZC (b) and BZC (c).

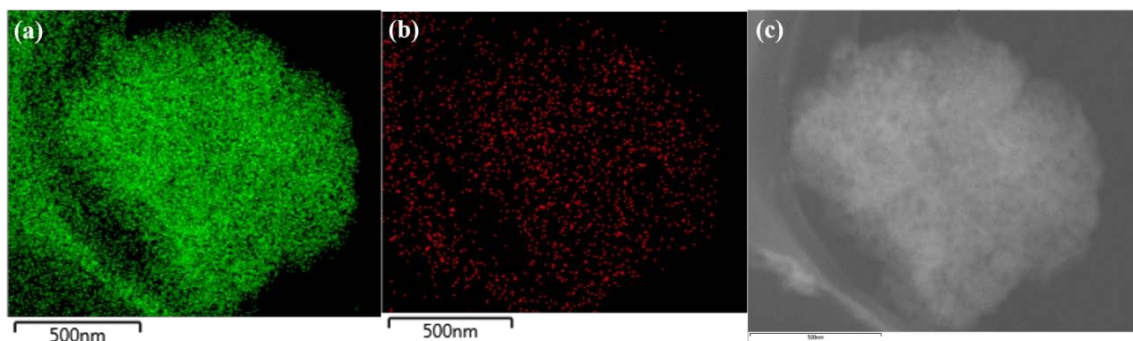

Fig. S9. STEM-EDS mapping of C (a), O (b) and HAADF-STEM image (c) of NBZC.

The chemical composition of NBZC was characterised using the scanning transmission electron microscopy - energy dispersive spectrometer (STEM - EDS) and XPS techniques. The STEM - EDS images, Figs. S9a-b, and the STEM image conducted in a high-angle annular dark field mode (HAADF - STEM), Fig. S9c, show that oxygen uniformly presents in the sample. The XPS survey spectrum of NBZC is shown in Fig. 4a. The two distinct peaks at 284.4 eV and 532 eV correspond to binding energies of C 1s and O 1s electrons, respectively. The quantitative analysis of the spectrum showed that it contains 90.8 at% C and 9.2 at% O. The presence of oxygen was due to partial oxidation of the carbon framework during the zeolite template removal process using HF/HCl solution. This process involves heat generation and the heat increases with the amount of washed samples. Therefore, the oxygen content of the carbon prepared in a large scale is slightly higher than that of the one prepared in a small scale. Fig. 4b shows the deconvolution of C 1s peak. Four peaks corresponding to  $sp^2$  C-C (284.4 eV),  $sp^3$  C-C (285.2 eV), C-O (286.1 eV) and C=O (288.4 eV) can be seen.<sup>1, 5</sup> The O 1s peaks at 531.3 and 532.8 eV correspond to C=O and C-O respectively.<sup>6</sup>

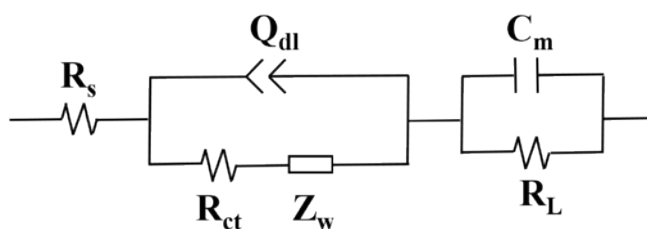

Fig. S10. Equivalent circuit used for the simulation of EIS data.

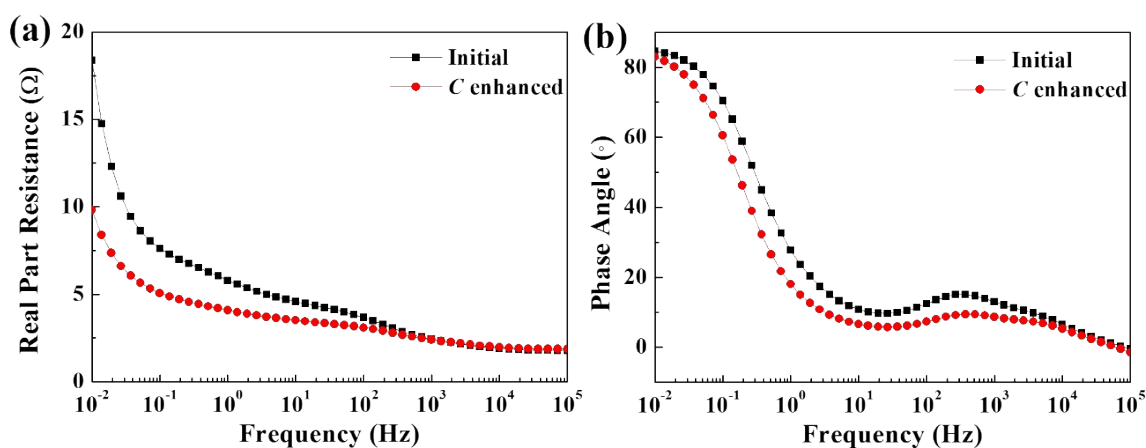

Fig. S11. Real part resistance vs frequency (a) and Bode phase angle plots (b) of the symmetric capacitor with 1 M  $\text{H}_2\text{SO}_4$  as the electrolyte of NBZC.

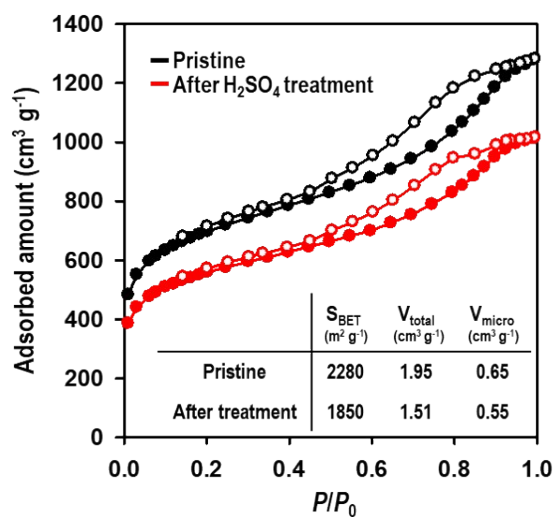

Figure S12.  $\text{N}_2$  adsorption-desorption isotherms and textural properties (inset) of the sample NBZC before and after 1 M  $\text{H}_2\text{SO}_4$  treatment for 1 d at 25 °C.

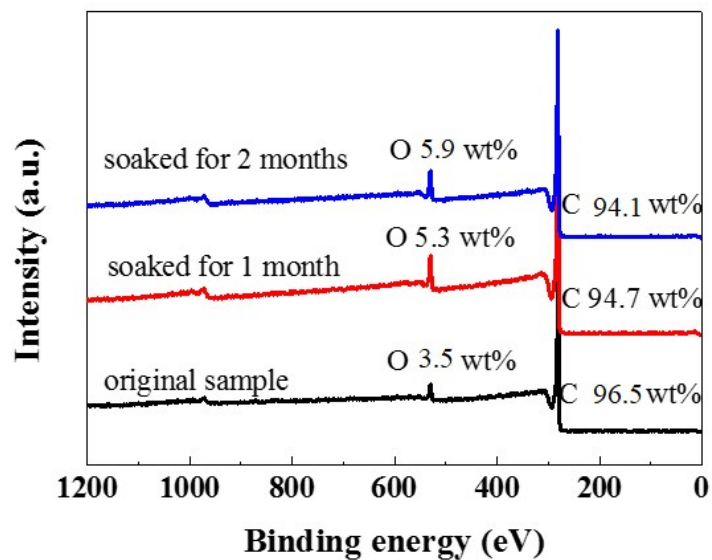

Figure S13. XPS survey spectra of original sample NBZC as well as that of soaked after 1 month and 2 months.

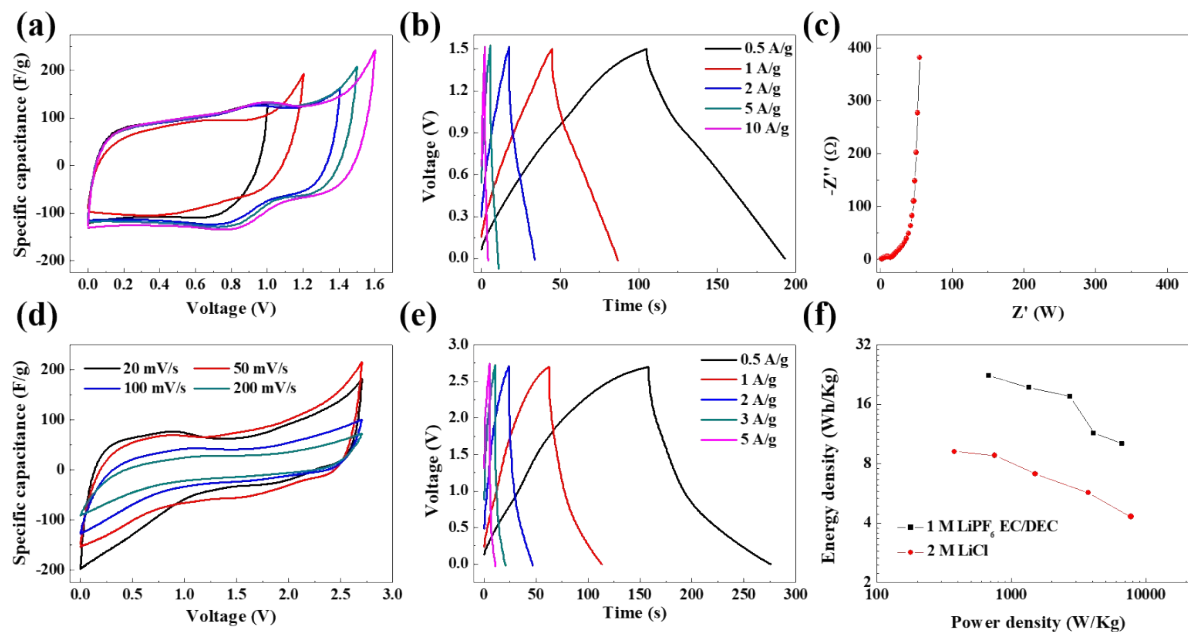

Fig. S14. Electrocapacitive performance of electrode NBZC in a symmetric cell with 2 M LiCl (a, b, c) or 1 M LiPF<sub>6</sub> EC/DEC (d, e, f) as electrolyte.

The real part specific capacitance ( $C'$ ):

$$C'(\omega) = \frac{-Z''(\omega)}{\omega |Z(\omega)|^2} \quad (1)$$

The imagine part specific capacitance ( $C''$ )

$$C''(\omega) = \frac{Z'(\omega)}{\omega |Z(\omega)|^2} \quad (2)$$

Table S1. Specific capacitance values of NBZC at different current densities in a three-electrode system with 1 M H<sub>2</sub>SO<sub>4</sub> as aqueous electrolyte.

| Current density (A/g) | 0.2 | 0.5 | 1   | 2   | 5   | 10  | 15  | 20  |
|-----------------------|-----|-----|-----|-----|-----|-----|-----|-----|
| $C_s$ (F/g)           | 307 | 268 | 250 | 235 | 215 | 199 | 189 | 177 |

Table S2. Comparison of the preparation and properties of porous carbon materials and their use in SCs

| Carbon precursor        | Carbon-based electrodes                 | Pore structure                           | Preparation method                                          | SSA (m <sup>2</sup> /g) | Specific capacitance                                                                                                                                                                                                                                                    | Cycle stability                                                     | Ref.             |
|-------------------------|-----------------------------------------|------------------------------------------|-------------------------------------------------------------|-------------------------|-------------------------------------------------------------------------------------------------------------------------------------------------------------------------------------------------------------------------------------------------------------------------|---------------------------------------------------------------------|------------------|
| Carbon nanofibers       | Nitrogen-doped porous carbon nanofibers | Micro/meso/macroporous                   | Carbonization                                               | 562                     | 202 F/g at 1 A/g, three-electrode, 6M KOH                                                                                                                                                                                                                               | 97 % retention after 3000 cycles at 1 A/g                           | <sup>7</sup>     |
| Lignin                  | Porous lignin-derived carbon            | 3D hierarchically porous                 | KOH activation                                              | 907                     | 185 F/g at 0.05 A/g, two-electrode, 1M H <sub>2</sub> SO <sub>4</sub>                                                                                                                                                                                                   | 97.3 % retention after 5000 cycles at 1 A/g                         | <sup>8</sup>     |
| Polypyrrole microsheets | Nitrogen-doped porous carbon            | 3D hierarchically micro/meso/macroporous | KOH activation                                              | 2870                    | 318 F/g at 0.5 A/g, three-electrode, 6M KOH                                                                                                                                                                                                                             | 95.8 % retention after 10000 cycles at 5 A/g                        | <sup>9</sup>     |
| Eggshell membranes      | Porous carbon film                      | 3D macroporous                           | Air activation                                              | 221                     | 284 F/g at 0.2 A/g, three-electrode, 1M H <sub>2</sub> SO <sub>4</sub>                                                                                                                                                                                                  | 97 % retention after 10000 cycles at 4 A/g                          | <sup>10</sup>    |
| Pig bone                | Porous carbon                           | Hierarchically micro/meso/macroporous    | KOH activation                                              | 2157                    | 185 F/g at 0.05 A/g, two-electrode, 7M KOH                                                                                                                                                                                                                              | -                                                                   | <sup>11</sup>    |
| Pitch                   | pillared-porous carbon nanosheet        | 3D mesoporous                            | MgO-template                                                | 883                     | 289 F/g at 2 mV/s, three-electrode, 6M KOH                                                                                                                                                                                                                              | 94 % retention after 10000 cycles at 200 mV/s                       | <sup>12</sup>    |
| GO                      | RGO hydrogel film                       | Hierarchically meso/macroporous          | Blade-cast and freeze drying                                | 1316                    | 71 mF/cm <sup>2</sup> at 1 mA/cm <sup>2</sup> , two-electrode, 1M H <sub>2</sub> SO <sub>4</sub>                                                                                                                                                                        | 98 % retention after 5000 cycles at 10 mA/cm <sup>2</sup>           | <sup>13</sup>    |
| Flaked graphite         | RGO film                                | 3D porous                                | CaCO <sub>3</sub> -template                                 | -                       | ~125 F/g at 0.5 A/g, two-electrode, 1M H <sub>2</sub> SO <sub>4</sub>                                                                                                                                                                                                   | 90 % retention after 5000 cycles at 5 A/g                           | <sup>14</sup>    |
| Glucose                 | Porous carbon hollow spheres            | Micropore shell with meso/mcropore cores | Colloidal silica hard template                              | 658                     | 269 F/g at 0.5 A/g, three-electrode, 6M KOH                                                                                                                                                                                                                             | 92 % retention after 1000 cycles at 5 A/g                           | <sup>15</sup>    |
| Gelatin                 | Nitrogen-doped porous carbon            | Microporous/mesoporous                   | Dual-template                                               | 1518                    | 110 F/g at 2 A/g, two-electrode cell, 1M EMIMBF <sub>4</sub> /AN                                                                                                                                                                                                        | 98.2% retention after 10000 cycles at 20 A/g                        | <sup>16</sup>    |
| Phenolic resol          | Porous carbon spheres                   | 3D Mesoporous                            | Dual-template                                               | 1320                    | 208 F/g at 0.5 A/g, three-electrode, 2M H <sub>2</sub> SO <sub>4</sub>                                                                                                                                                                                                  | ~100 % retention after 1000 cycles at 1.59 A/g                      | <sup>17</sup>    |
| PAN                     | Nitrogen-doped carbon nanofibers        | Hierarchically micro/mesoporous          | Dual-template                                               | 699                     | 170 F/g at 1 A/g, two-electrode, 6M KOH                                                                                                                                                                                                                                 | 94 % retention after 8000 cycles at 1 A/g                           | <sup>18</sup>    |
| Coal tar pitch          | Hierarchical porous carbon              | Hierarchically micro/mesoporous          | Fe <sub>2</sub> O <sub>3</sub> -template and KOH activation | 1330                    | 194 F/g at 0.1 A/g, two-electrode, 6M KOH                                                                                                                                                                                                                               | 93.2 % retention after 1000 cycles at 0.1 A/g                       | <sup>19</sup>    |
| Gelatin                 | Porous carbon nanosheets                | 2D porous carbon nanosheet               | Montmorillonite-template and KOH activation                 | 2270                    | 228 F/g at 1 A/g, two-electrode, 6M KOH                                                                                                                                                                                                                                 | -                                                                   | <sup>20</sup>    |
| MOF-5                   | Porous carbon                           | Microporous/mesoporous                   | MOF-template and KOH activation                             | 2222                    | 271 F/g at 2 mV/s, three-electrode, 6M KOH                                                                                                                                                                                                                              | -                                                                   | <sup>21</sup>    |
| Ethylene                | Porous carbon                           | 3D hierarchically micro/mesoporous       | calcium-catalysed zeolite-template                          | 2280                    | 307 F/g at 0.2 A/g, three-electrode, 1M H <sub>2</sub> SO <sub>4</sub><br>413 mF/cm <sup>2</sup> at 0.25 mA/cm <sup>2</sup> , two-electrode, PVA/ H <sub>2</sub> SO <sub>4</sub><br>(active material area of 1 cm <sup>2</sup> , mass loading of 2 mg/cm <sup>2</sup> ) | 153 % retention two-month-shelfing time after 17000 cycles at 1 A/g | <b>This work</b> |

Table S3. Areal specific capacitance values of NBZC at different current densities in an all-solid-state capacitor with PVA / H<sub>2</sub>SO<sub>4</sub> gel as the electrolyte.

| Current density (mA/cm <sup>2</sup> )      | 0.25 | 0.5 | 1   | 2   | 5   | 10  | 15  | 20  |
|--------------------------------------------|------|-----|-----|-----|-----|-----|-----|-----|
| <i>C<sub>a</sub></i> (mF/cm <sup>2</sup> ) | 413  | 400 | 380 | 358 | 314 | 246 | 197 | 160 |

## Reference

1. K. Kim, T. Lee, Y. Kwon, Y. Seo, J. Song, J. K. Park, H. Lee, J. Y. Park, H. Ihee and S. J. Cho, *Nature*, 2016, **535**,131-147.
2. Z. Yang, Y. Xia and R. Mokaya, *J. Am. Chem. Soc.*, 2007, **129**, 1673-1679.
3. K. Kim, M. Choi and R. Ryoo, *Carbon*, 2013, **60**, 175-185.
4. Y. Xia, Z. Yang and R. Mokaya, *Nanoscale*, 2010, **2**, 639-659.
5. L. Sun, C. Tian, M. Li, X. Meng, L. Wang, R. Wang, J. Yin and H. Fu, *J. Mater. Chem. A*, 2013, **1**, 6462-6470.
6. S. Song, F. Ma, G. Wu, D. Ma, W. Geng and J. Wan, *J. Mater. Chem. A*, 2015, **3**, 18154-18162.
7. L.-F. Chen, X.-D. Zhang, H.-W. Liang, M. Kong, Q.-F. Guan, P. Chen, Z. Y. Wu and S. H. Yu, *ACS nano*, 2012, **6**, 7092-7102.
8. W. Zhang, H. Lin, Z. Lin, J. Yin, H. Lu, D. Liu and M. Zhao, *ChemSusChem*, 2015, **8**, 2114-2122.
9. L. Qie, W. Chen, H. Xu, X. Xiong, Y. Jiang, F. Zou, X. Hu, Y. Xin, Z. Zhang and Y. Huang, *Energy Environ. Sci.*, 2013, **6**, 2497-2504.
10. Z. Li, L. Zhang, B. S. Amirkhiz, X. Tan, Z. Xu, H. Wang, B. C. Olsen, C. Holt and D. Mitlin, *Adv. Energy Mater.*, 2012, **2**, 431-437.
11. W. Huang, H. Zhang, Y. Huang, W. Wang and S. Wei, *Carbon*, 2011, **49**, 838-843.
12. Z. Fan, Y. Liu, J. Yan, G. Ning, Q. Wang, T. Wei, L. Zhi and F. Wei, *Adv. Energy Mater.*, 2012, **2**, 419-424.
13. Z. Xiong, C. Liao, W. Han and X. Wang, *Adv. Mater.*, 2015, **27**, 4469-4475.
14. Y. Meng, K. Wang, Y. Zhang and Z. Wei, *Adv. Mater.*, 2013, **25**, 6985-6990.
15. Y. Han, X. Dong, C. Zhang and S. Liu, *J. Power Sources*, 2012, **211**, 92-96.
16. X. Y. Chen, C. Chen, Z. J. Zhang and D. H. Xie, *J. Mater. Chem. A*, 2013, **1**, 10903-10911.
17. Q. Li, R. Jiang, Y. Dou, Z. Wu, T. Huang, D. Feng, J. Yang, A. Yu and D. Zhao, *Carbon*, 2011, **49**, 1248-1257.
18. Q. Wang, Q. Cao, X. Wang, B. Jing, H. Kuang and L. Zhou, *J. Solid State. Electrochem.*, 2013, **17**, 2731-2739.
19. X. He, N. Zhao, J. Qiu, N. Xiao, M. Yu, C. Yu, X. Zhang and M. Zheng, *J. Mater. Chem. A*, 2013, **1**, 9440-9448.

20. X. Fan, C. Yu, J. Yang, Z. Ling, C. Hu, M. Zhang and J. Qiu, *Adv. Energy Mater.*, 2015, **5**, 14011761.
21. J. Hu, H. Wang, Q. Gao and H. Guo, *Carbon*, 2010, **48**, 3599-3606.
